# Supplementary material for: Tollip coordinates Parkin‐dependent trafficking of mitochondrial‐derived vesicles
Source: PubMed Central journal article supplement (PMC7265236; doi:10.15252/embj.2019102539), 2020-04-20
Supplement: EMBJ-39-e102539-s005.pdf [file EMBJ-39-e102539-s005.pdf]

Figure 3B

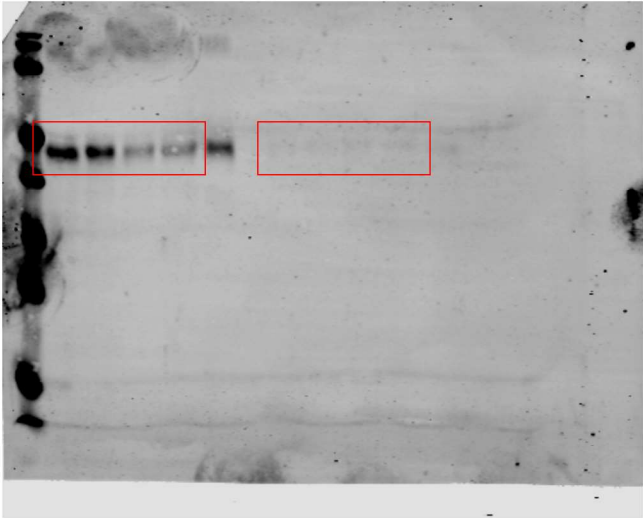

HA-Parkin

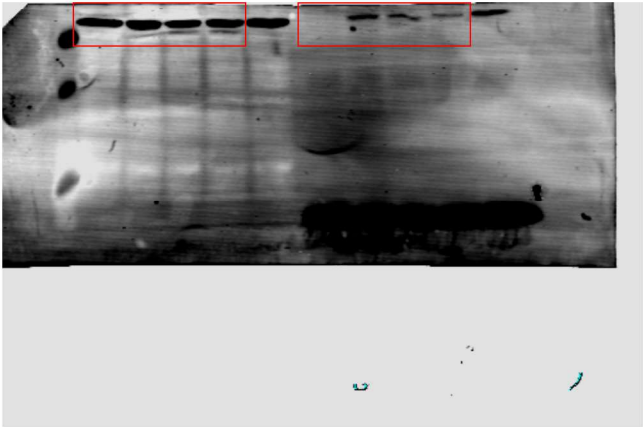

myc-BioID
