# Supplementary material for: Tollip coordinates Parkin‐dependent trafficking of mitochondrial‐derived vesicles
Source: PubMed Central journal article supplement (PMC7265236; doi:10.15252/embj.2019102539), 2020-04-20

Figure 4H

VPS35

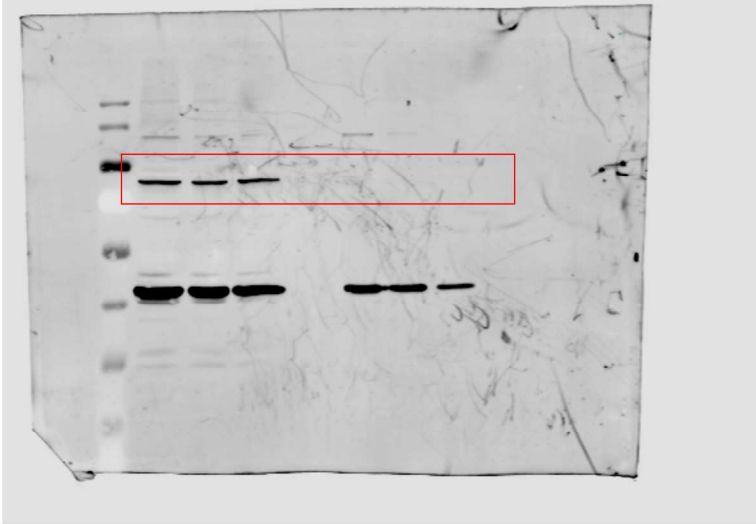

myc

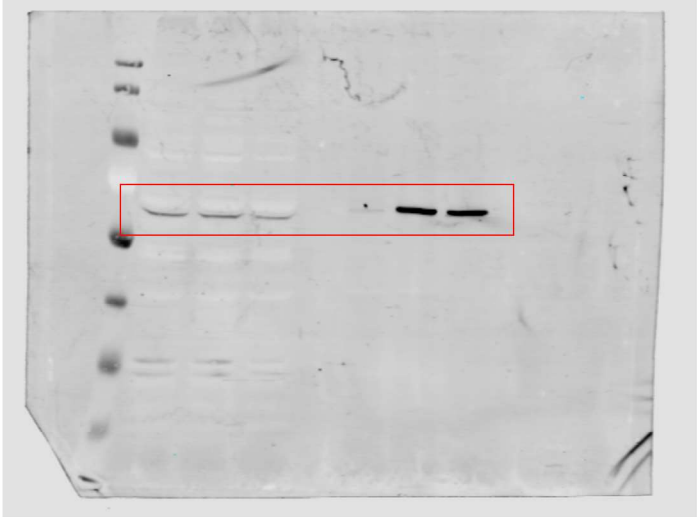

Tom1

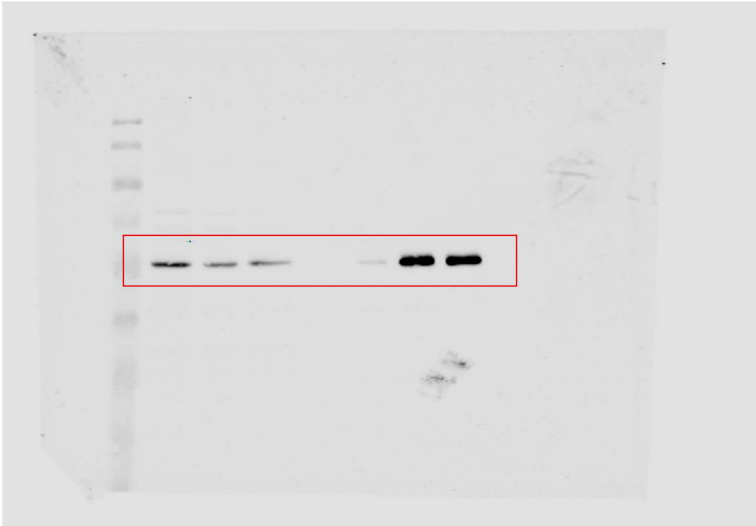

HA

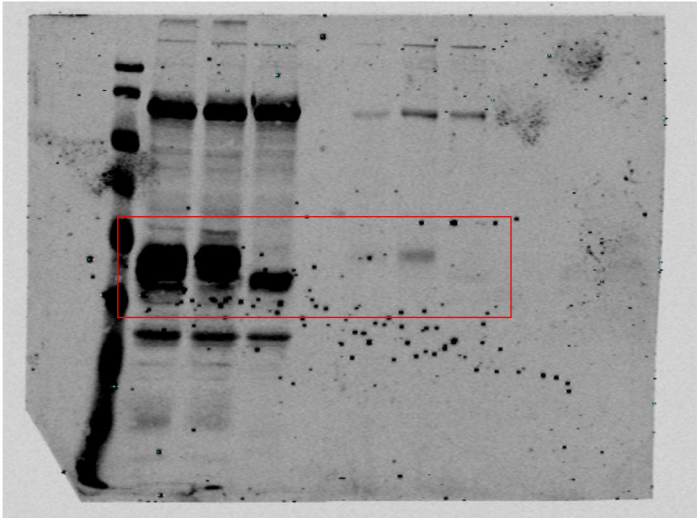

Supplement: EMBJ-39-e102539-s011.pdf [file EMBJ-39-e102539-s011.pdf]
